# Supplementary material for: α-Linolenic acid prevents endoplasmic reticulum stress-mediated apoptosis of stearic acid lipotoxicity on primary rat hepatocytes
Source: Springer Nature journal article supplement (doi:10.1186/1476-511x-10-81), 2011-05-18

A

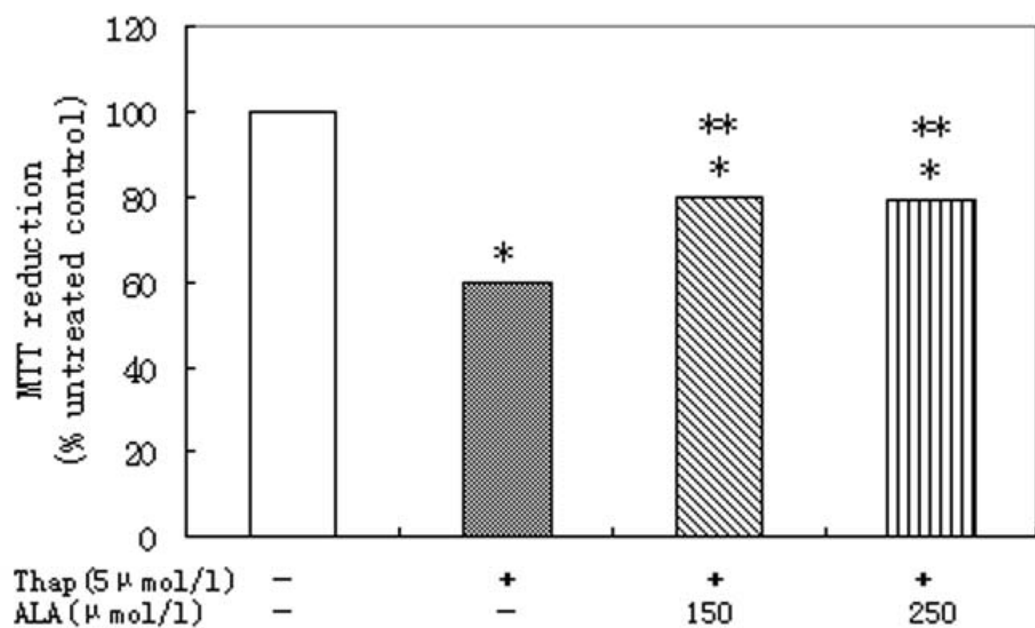

B

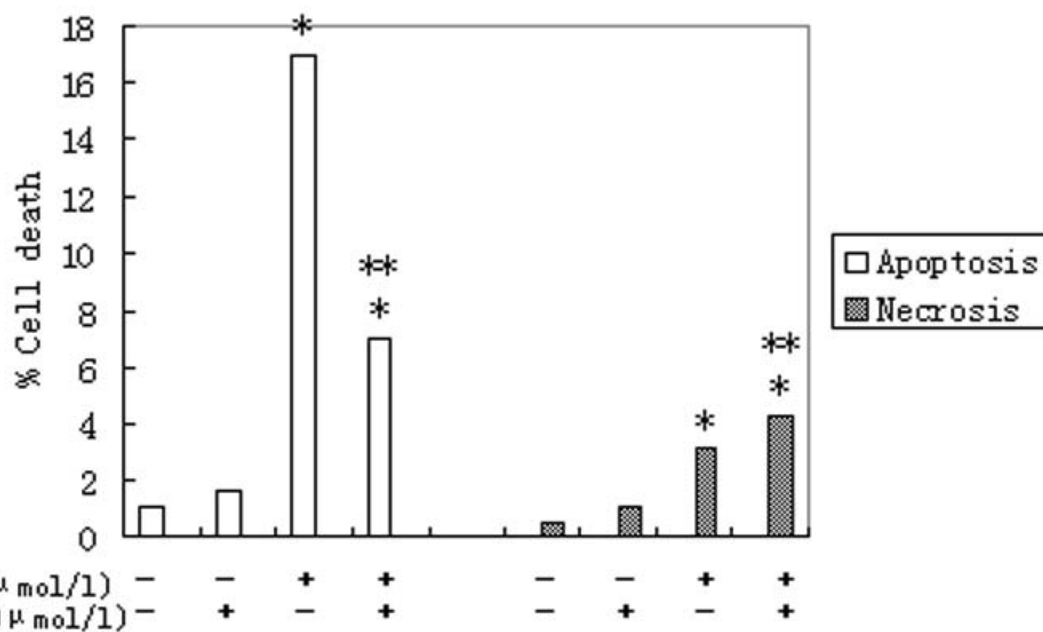

Supplement: 12944_2010_469_MOESM3_ESM.pdf [file 12944_2010_469_MOESM3_ESM.pdf]
